# Supplementary material for: Normal recognition of famous voices in developmental prosopagnosia
Source: PubMed Central journal article supplement (PMC7661722; doi:10.1038/s41598-020-76819-3), 2020-11-12
Supplement: 41598_2020_76819_MOESM1_ESM.pdf [file 41598_2020_76819_MOESM1_ESM.pdf]

## Normal recognition of famous voices in developmental prosopagnosia

Maria Tsantani and Richard Cook

### Supplementary information

#### *Identification accuracy unadjusted for name familiarity*

In the main analysis, participants' performance in the famous voice and face recognition tasks was quantified as the proportion of voices or faces that were correctly identified, after discarding the trials featuring people that weren't known by name. Here, we report results including these trials.

Mean voice recognition performance was highly similar in DPs ( $M = 55.0\%$ ,  $SD = 15.46$ ) and controls ( $M = 59.17\%$ ,  $SD = 20.33$ ) [ $t(64) = .845$ ,  $p = .401$ ,  $d = .218$ ,  $CI_{95\%} = -.293, .733$ ]. Face recognition performance was significantly lower in DPs ( $M = 49.52\%$ ,  $SD = 22.57$ ) compared with controls ( $M = 80.45\%$ ,  $SD = 15.41$ ) [ $t(31.103) = 5.788$ ,  $p < .001$ ,  $d = 1.601$ ,  $CI_{95\%} = .870, 2.137$ ].

To investigate how famous face recognition ability compares to famous voice recognition ability in DPs and controls, we analysed performance on the face and voice tests in an ANOVA with Modality (faces, voices) as a within-subjects factor and Group (DPs, controls) as a between-subjects factor. There was a significant Modality  $\times$  Group interaction [ $F(1,64) = 39.056$ ,  $p < .001$ ,  $\eta_p^2 = .379$ ], driven by controls recognising more faces than voices [ $t(43) = 8.863$ ,  $p < .001$ ,  $d = 1.159$ ,  $CI_{95\%} = .816, 1.537$ ], and a non-significant trend for DPs recognising more voices than faces [ $t(21) = 1.483$ ,  $p = .153$ ,  $d = .273$ ,  $CI_{95\%} = -.104, .664$ ]. There were also significant main effects of Modality [ $F(1,64) = 13.619$ ,  $p < .001$ ,  $\eta_p^2 = .175$ ] and Group [ $F(1,64) = 16.475$ ,  $p < .001$ ,  $\eta_p^2 = .205$ ], driven by better overall performance in the face task, and better overall performance of controls, respectively.

#### *Perceived familiarity unadjusted for name familiarity*

Here we report results for judgements of perceived familiarity, without removing trials featuring people that were not subsequently recognised by name. Voice familiarity scores were similar for DPs ( $M = 73.79\%$ ,  $SD = 13.38$ ) and controls ( $M = 76.21\%$ ,  $SD = 17.98$ ) [ $t(64) = .559$ ,  $p = .578$ ,  $d = .144$ ,  $CI_{95\%} = -.367, .658$ ]. In the famous face task, familiarity scores were significantly lower in DPs ( $M = 67.40\%$ ,  $SD = 21.53$ ) compared with controls ( $M = 91.36\%$ ,  $SD = 11.55$ ) [ $t(27.206) = 4.880$ ,  $p < .001$ ,  $d = 1.387$ ,  $CI_{95\%} = .653, 1.879$ ]. ANOVA with Modality (faces, voices) as a within-subjects factor and Group (DPs, controls) as a between-subjects factor revealed a significant Modality  $\times$  Group interaction [ $F(1,64) =$

30.776,  $p < .001$ ,  $\eta_p^2 = .325$ ], driven by controls being familiar with more faces than voices [ $t(43) = 7.048$ ,  $p < .001$ ,  $d = .985$ ,  $CI_{95\%} = .649, 1.349$ ], and DPs tending to be familiar with more voices than faces, although the difference was not significant in a pairwise test [ $t(21) = 1.867$ ,  $p = .076$ ,  $d = .343$ ,  $CI_{95\%} = -.037, .741$ ]. There were significant main effects of Modality [ $F(1,64) = 55.100$ ,  $p = .027$ ,  $\eta_p^2 = .074$ ] and Group [ $F(1,64) = 12.533$ ,  $p = .001$ ,  $\eta_p^2 = .164$ ].

Table S1. Names of the celebrities presented in the face and voice recognition tasks.

| <b>Face recognition task</b> |                      | <b>Voice recognition task</b> |                    |
|------------------------------|----------------------|-------------------------------|--------------------|
| Adele                        | Andy Murray          | Cheryl Cole                   | Alan Carr          |
| Victoria Beckham             | Benedict Cumberbatch | Theresa May                   | Alan Rickman       |
| Kate Middleton               | David Cameron        | Sharon Osbourne               | Billy Connolly     |
| Audrey Hepburn               | Hugh Grant           | Queen Elizabeth               | Boris Johnson      |
| Helena Bonham Carter         | Tony Blair           | Cilla Black                   | Stephen Fry        |
| Maggie Smith                 | Jamie Oliver         | Emma Watson                   | Sean Connery       |
| Naomi Campbell               | Colin Firth          | Holly Willoughby              | Nigel Farage       |
| Olivia Colman                | Daniel Craig         | Jo Brand                      | Michael Caine      |
| Keira Knightley              | Simon Cowell         | Joanna Lumley                 | David Attenborough |
| Margaret Thatcher            | Gordon Ramsey        | Judi Dench                    | John Cleese        |
| Kate Winslet                 | Rowan Atkinson       | Julie Waters                  | Jonathan Ross      |
| Angelina Jolie               | Bill Clinton         | Mila Kunis                    | Barack Obama       |
| Sandra Bullock               | George W Bush        | Dolly Parton                  | Will Smith         |
| Meryl Streep                 | Matt Damon           | Ellen DeGeneres               | Tom Hanks          |

Table S2. Correlations ( $r_s$ ) between different measures for both groups combined, and for DPs and controls separately.

|                                  |           | Voices |           |         | Faces   |           |         |
|----------------------------------|-----------|--------|-----------|---------|---------|-----------|---------|
|                                  |           | Ident. | Name fam. | Exp.    | Ident.  | Name fam. | Exp.    |
| <b>Combined sample (N = 66)</b>  |           |        |           |         |         |           |         |
| Voices                           | Ident.    | 1.000  | .297*     | .320**  | .476*** | .484***   | .228    |
|                                  | Name fam. |        | 1.000     | .443*** | .567*** | .571***   | .294*   |
|                                  | Exp.      |        |           | 1.000   | .364**  | .471***   | .817*** |
| Faces                            | Ident.    |        |           |         | 1.000   | .485***   | .367**  |
|                                  | Name fam. |        |           |         |         | 1.000     | .478*** |
|                                  | Exp.      |        |           |         |         |           | 1.000   |
| <b>DPs (N = 22)</b>              |           |        |           |         |         |           |         |
| Voices                           | Ident.    | 1.000  | .041      | .156    | .537*   | .251      | .359    |
|                                  | Name fam. |        | 1.000     | .668**  | .559**  | .507*     | .344    |
|                                  | Exp.      |        |           | 1.000   | .493*   | .609**    | .747*** |
| Faces                            | Ident.    |        |           |         | 1.000   | .474*     | .519*   |
|                                  | Name fam. |        |           |         |         | 1.000     | .666**  |
|                                  | Exp.      |        |           |         |         |           | 1.000   |
| <b>Typical controls (N = 44)</b> |           |        |           |         |         |           |         |
| Voices                           | Ident.    | 1.000  | .395**    | .386**  | .594*** | .570***   | .183    |
|                                  | Name fam. |        | 1.000     | .436**  | .455**  | .574***   | .343*   |
|                                  | Exp.      |        |           | 1.000   | .544*** | .435**    | .857*** |
| Faces                            | Ident.    |        |           |         | 1.000   | .576***   | .526*** |
|                                  | Name fam. |        |           |         |         | 1.000     | .405**  |
|                                  | Exp.      |        |           |         |         |           | 1.000   |

Nb. 'Ident.' refers to the proportion of faces/voice identified (including only celebrities who were known by name); 'Name fam.' refers to the number of names reported as known; 'Exp.' refers to the perceived frequency of exposure to the celebrities' faces/voices. \* $p < .05$ ; \*\* $p < .01$ ; \*\*\* $p < .001$ .
